# Supplementary material for: The Risk of Congenital Heart Anomalies Following Prenatal Exposure to Serotonin Reuptake Inhibitors—Is Pharmacogenetics the Key?
Source: MDPI journal article supplement (doi:10.3390/ijms17081333), 2016-08-13
Supplement: s1 [file s1]

# Supplementary Materials: The Risk of Congenital Heart Anomalies Following Prenatal Exposure to Serotonin Reuptake Inhibitors—Is Pharmacogenetics the Key?

Aizati N. A. Daud, Jorieke E. H. Bergman, Wilhelmina S. Kerstjens-Frederikse, Henk Groen and Bob Wilffert

## Supplementary Materials

This Word document summarizes the studies published from 2005 through 2015 that either do (Table S1) or do not (Table S2) find an association between the use of serotonin reuptake inhibitors (SRIs) during early pregnancy and the risk of congenital heart anomalies (CHA) and/or other congenital anomalies (CA).

## Search Strategy

A literature review was performed in May 2015 using the PubMed database. Articles are searched using the combinations of the following keywords: “Serotonin Uptake Inhibitors” [Mesh], “Congenital Abnormalities” [Mesh], and “humans” [MeSH Terms]. See Supplementary Figure S1 for the search strategy outline.

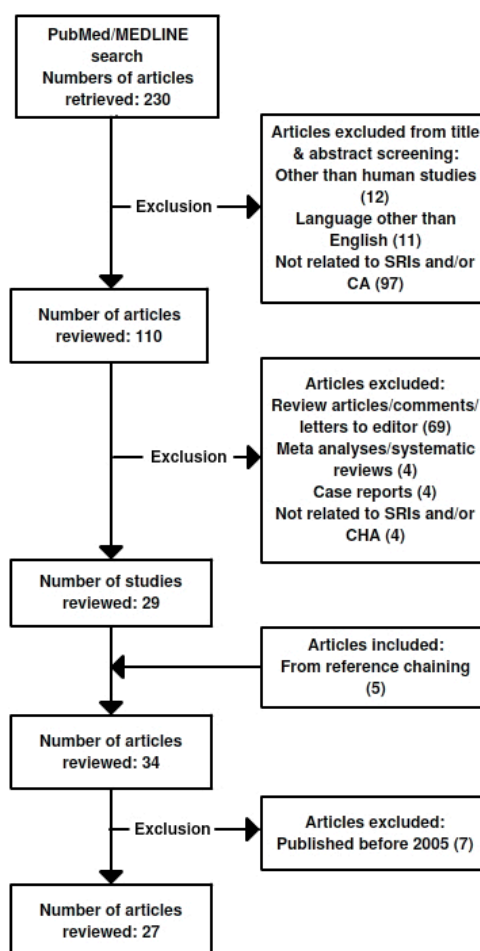

**Figure S1.** Flow-chart outlining the search strategy. SRIs, serotonin reuptake inhibitors; CA, congenital anomalies; CHA, congenital heart anomalies.

**Table S1.** Studies (2005–2015) that found an association between SRI use in early pregnancy and the risk of congenital anomalies including CHA.

| Authors                   | Study Design (Database Used)                                 | Location              | Number of Patients                                                                               | SRI/SSRIs                                           | Definition of First Trimester Exposure                                          | Outcome (Anomalies) Definition                                                                                 | Drawn Conclusion                                                                                                                                   |
|---------------------------|--------------------------------------------------------------|-----------------------|--------------------------------------------------------------------------------------------------|-----------------------------------------------------|---------------------------------------------------------------------------------|----------------------------------------------------------------------------------------------------------------|----------------------------------------------------------------------------------------------------------------------------------------------------|
| Be' rard et al., 2015 [6] | Cohort study (pregnancy cohort)                              | Canada                | 18,493 pregnancies (2329 exposed to SRIs)                                                        | Sertraline & other SSRIs                            | 14 weeks of the first trimester (confirmed with ultrasound)                     | Major congenital anomalies detected within the first year of life                                              | Infants exposed to sertraline were at increased risk of ASD and VSD                                                                                |
| Wemakor et al., 2015 [7]  | Case-malformed control study (congenital anomaly registries) | 12 European countries | 42,983 cases and malformed controls (including TOP, miscarriages, stillbirths), 12,876 CHA cases | Any SSRIs without any other type of antidepressants | First day of the LMP up to 12th week of gestation                               | Major CHA (excluding preterm deliveries with only PDA and all cases with open foramen ovale)                   | Result supports teratogenic effects of SSRIs specific to certain anomalies, but cannot exclude confounding by indication or associated factors     |
| Ban et al., 2014 [8]      | Cohort study (primary care records)                          | UK                    | 325,294 women without depression, 7683 women exposed to SSRIs                                    | SSRIs alone, SSRIs + TCAs                           | 1 month before to 3 months after conception                                     | Major congenital anomalies, overall and specific                                                               | Paroxetine increases the risk of CHA. The risk of overall major congenital anomalies did not increase with maternal depression & antidepressants   |
| Knudsen et al., 2014 [9]  | Cohort study (birth defects registry)                        | Denmark               | 845 exposed, 71,435 not exposed                                                                  | SSRIs                                               | 30 days before LMP until 91 days after LMP                                      | CHA detected within first 5 years of life (excluding chromosomal anomalies, genetic syndrome or microdeletion) | SSRI use increases the risk of severe CHA and socioeconomic status did not confound the risk                                                       |
| Polen et al., 2013 [10]   | Case-control study (NBDPS)                                   | USA                   | 27,045 women. Exposed: 14/8002 (0.17%) of controls, 77/19,043 (0.4%) of cases                    | Venlafaxine                                         | 1 month before conception & first trimester (maternal interview after delivery) | 30 selected birth defects                                                                                      | Associations found for certain birth defects, especially anencephaly, cleft palate, gastroschisis, and some CHD (ASD, coarctation of aorta, LVOTO) |
| Malm et al., 2011 [11]    | Retrospective cohort (national birth registers)              | Finland               | 6881 exposed, 618,727 not exposed                                                                | SSRIs                                               | 1 month before pregnancy & first trimester (based on LMP and U/S data)          | Major congenital anomalies (does not exclude chromosomal abnormalities)                                        | Associations found for specific CV anomalies; fluoxetine & isolated VSD, paroxetine & right ventricular outflow defect                             |

Table S1. Cont.

| Authors                       | Study Design<br>(Database Used)                                   | Location                  | Number of Patients                                                                                        | SRI/SSRI                         | Definition of First<br>Trimester Exposure                                                      | Outcome (Anomalies)<br>Definition                                                          | Drawn Conclusion                                                                                                                                     |
|-------------------------------|-------------------------------------------------------------------|---------------------------|-----------------------------------------------------------------------------------------------------------|----------------------------------|------------------------------------------------------------------------------------------------|--------------------------------------------------------------------------------------------|------------------------------------------------------------------------------------------------------------------------------------------------------|
| Reis and Kallén, 2010 [12]    | Case-control study<br>(national birth registers)                  | Sweden                    | 14,821 exposed,<br>1,062,190 not exposed                                                                  | Antidepressants                  | Early use: ~10–12 weeks,<br>Later use: subsequent<br>prescription                              | ‘Relatively severe<br>malformations’ excluding<br>chromosomal abnormalities                | Associations found between<br>paroxetine and<br>cardiovascular defects, and<br>between SSRI and<br>hypospadias (particularly<br>with paroxetine)     |
| Bakker et al., 2010 [13]      | Case-malformed<br>control study (birth<br>defect registry)        | Netherlands               | 678 cases of isolated<br>heart defects,<br>615 controls of<br>chromosomal<br>anomalies                    | Paroxetine                       | 4 weeks before<br>conception until 12th<br>week of pregnancy                                   | Major isolated CHA                                                                         | Increased risk of isolated<br>ASD with paroxetine use in<br>the first trimester, but the<br>absolute risk is small                                   |
| Merlob et al., 2009 [14]      | Prospective study<br>(birth defect<br>surveillance<br>database)   | Israel                    | 67,871 infants<br>(235 exposed, 2537<br>not exposed)                                                      | SSRIs                            | First trimester (based on<br>maternal interview<br>upon admission to<br>maternity ward)        | Cardiac murmur on the first<br>day of life and persist on 2nd<br>and 3rd day               | Increased risk of mild,<br>non-syndromic heart defects<br>in infants exposed to SSRIs<br>(small risk)                                                |
| Pedersen et al., 2009 [15]    | Cohort study<br>(national health &<br>birth defect<br>registries) | Denmark                   | 1370 exposed,<br>493,113 not exposed                                                                      | SSRIs (two or<br>more filled Rx) | 28 days before to 112<br>days after gestation.                                                 | CHA detected within the first<br>year of life (exclude stillbirth<br>and multiple births)  | Citalopram and sertraline<br>were associated with an<br>increased prevalence of<br>septal heart defects<br>(limited risk)                            |
| Diav-Citrin et al., 2008 [16] | Prospective study<br>(multi-centre TIS)                           | Israel, Italy,<br>Germany | 463 exposed to<br>paroxetine, 346<br>exposed to fluoxetine,<br>1467 control: exposed<br>to non-teratogens | Paroxetine and<br>fluoxetine     | Paroxetine: between<br>weeks 3–13, fluoxetine:<br>between weeks 2–13<br>after LMP              | Major congenital anomalies,<br>including VSD, detected<br>within the first 6 years of life | Possible association between<br>CV anomalies and first<br>trimester exposure<br>to fluoxetine                                                        |
| Oberlander et al., 2008 [17]  | Cohort study<br>(national health<br>registries)                   | Canada                    | 2625 exposed,<br>107,320 not exposed                                                                      | SRI                              | Days of dosing covered<br>by the Rx overlapped<br>with the period from<br>LMP to LMP + 90 days | Major congenital anomalies                                                                 | The risk for cardiac<br>anomalies increased when<br>SRIs were used in<br>combination with<br>benzodiazepine (possible<br>effect of drug interaction) |

Table S1. Cont.

| Authors                       | Study Design<br>(Database Used)                                   | Location | Number of Patients                                                                                                                 | SRI/SSRIs                              | Definition of First<br>Trimester Exposure                                                  | Outcome (Anomalies)<br>Definition                                                  | Drawn Conclusion                                                                                                                                               |
|-------------------------------|-------------------------------------------------------------------|----------|------------------------------------------------------------------------------------------------------------------------------------|----------------------------------------|--------------------------------------------------------------------------------------------|------------------------------------------------------------------------------------|----------------------------------------------------------------------------------------------------------------------------------------------------------------|
| Cole et al.,<br>2007 [18]     | Cohort study<br>(insurance claim<br>database)                     | USA      | paroxetine:<br>791 (monotherapy),<br>989 (mono or<br>polytherapy);<br>other antidepressants:<br>mono (4072),<br>mono & poly (4767) | Paroxetine<br>mono- or poly<br>therapy | Prescription duration<br>overlapping with the<br>earliest conception date<br>until 91 days | All major congenital<br>malformations detected within<br>the first 9 months of age | Increased risk of overall<br>congenital anomalies with<br>paroxetine exposure during<br>the first trimester compared<br>to the use of other<br>antidepressants |
| Louik et al.,<br>2007 [19]    | Case-control study<br>(birth defects<br>surveillance<br>database) | USA      | 9849 infants with and<br>5860 infants without<br>birth defects                                                                     | SSRIs                                  | 28 days before to<br>112 days after the LMP                                                | Overall and specific<br>anomalies, major only                                      | Increased risk for some<br>specific anomalies with<br>individual SSRIs use<br>(small absolute risks)                                                           |
| Källén et al.,<br>2007 [20]   | Cohort study<br>(national birth<br>registries)                    | Sweden   | 6481 exposed,<br>873,876 not exposed                                                                                               | SSRIs                                  | Detected during the first<br>antenatal visit<br>(90% before the end of<br>week 12)         | Overall anomalies (including<br>minor conditions)                                  | Paroxetine increased the risk<br>of any cardiac anomalies,<br>mostly of ASD & VSD                                                                              |
| Berard et al.,<br>2007 [21]   | Case-control study<br>(national health<br>registries)             | Canada   | 1403 women.<br>542 exposed to<br>paroxetine, 443 to other<br>SSRIs, 418 to<br>other antidepressants                                | Paroxetine                             | The first trimester of<br>pregnancy (0–14 weeks<br>of gestational age)                     | Any major anomaly including<br>cardiac anomalies                                   | Association found only in<br>doses above 25 mg/day                                                                                                             |
| Wogelius<br>et al., 2006 [22] | Cohort study<br>(national birth<br>registry)                      | Denmark  | 1051 exposed,<br>150,780 not exposed                                                                                               | SSRIs                                  | 30 days before<br>conception until the end<br>of the first trimester                       | Congenital anomalies detected<br>within the first year of life                     | A moderately increased risk<br>of overall congenital<br>anomalies was found with<br>the use of SSRIs                                                           |

Abbreviations: SRI, serotonin reuptake inhibitor; SSRI, selective serotonin reuptake inhibitor; CHA, congenital heart anomalies; ASD, atrial septal defect; VSD, ventricular septal defect; TOP, termination of pregnancy; LMP, last menstrual period; PDA, patent ductus arteriosus; NBDPS, the National Birth Defects Prevention Study; LVOTO, left ventricular outflow tract obstruction; U/S, ultrasound; TIS, Teratology Information Service.

**Table S2.** Studies (2005–2015) reporting no association between SRI use in early pregnancy and the risk of congenital anomalies including CHA.

| Authors                                | Study Design                                                   | Location                                      | Number of Patients                                                                                                    | SSRIs                            | Definition of First Trimester Exposure                                                                                               | Outcome (Anomalies) Definition                                                        | Drawn Conclusion                                                                                          |
|----------------------------------------|----------------------------------------------------------------|-----------------------------------------------|-----------------------------------------------------------------------------------------------------------------------|----------------------------------|--------------------------------------------------------------------------------------------------------------------------------------|---------------------------------------------------------------------------------------|-----------------------------------------------------------------------------------------------------------|
| Furu et al., 2015 [23]                 | Cohort study and sibling design (national health registries)   | Denmark, Finland, Iceland, Norway, and Sweden | 2.3 million live singletons, 2288 sibling cohort                                                                      | All SSRIs, including venlafaxine | 30 days before the first day of LMP until the end of the first trimester                                                             | Major cardiac and other anomalies diagnosed within 1 year after birth                 | Results did not suggest teratogenic effect of SSRIs and venlafaxine                                       |
| Huybrechts et al., 2014 [24]           | Cohort study (national health registry)                        | USA                                           | 46,144 exposed to SSRIs, 885,115 not exposed                                                                          | SSRIs and other antidepressants  | Days/duration of Rx supplied overlap with 90 days the first trimester                                                                | Any cardiac malformations                                                             | Do not support earlier findings of an association between antidepressants & cardiac anomalies             |
| Vasilakis-Scaramozza et al., 2013 [25] | Matched cohort study (general practice records)                | UK                                            | 3276 exposed, 6617 non-exposed (singleton pregnancies)                                                                | TCA and SSRIs                    | At least one Rx of TCA or SSRIs from 180 to 335 days prior to delivery date for livebirth cases, and 70–225 days for stillbirths/TOP | Major congenital anomalies, detected before 1st birthday                              | Exposure to TCA or SSRIs does not increase the risk of congenital anomalies                               |
| Margulis et al. 2013 [26]              | Cohort study (national livebirth cohort)                       | UK                                            | 3046 exposed, 8991 not exposed                                                                                        | SSRIs                            | First trimester (assumption of pregnancy duration 273 days, for term, 258 days for preterm births)                                   | Cardiac malformation detected in the first year 6 years of life                       | No association found between maternal use of SSRIs and cardiac anomalies                                  |
| Klieger-Grossmann et al., 2012 [27]    | Observational cohort study (pregnancy surveillance registries) | Canada                                        | 6582 mothers (212 mothers in each group of escitalopram users, other antidepressants, and non-teratogenic drug users) | Escitalopram                     | The first trimester of pregnancy                                                                                                     | Major congenital malformations                                                        | Escitalopram was not associated with increased risk for major malformation                                |
| Einarson et al., 2009 [28]             | Matched-cohort study (teratogen information service)           | Canada                                        | 928 each in the exposed and unexposed groups                                                                          | Antidepressants (SSRIs, SNRIs)   | First trimester (based on maternal interview)                                                                                        | Major congenital malformations (maternal interview, corroborated by physician report) | No increase in the risk of major malformations with the use of antidepressants as a group or individually |

Table S2. Cont.

| Authors                     | Study Design                                 | Location | Number of Patients                                                                           | SSRIs                                                        | Definition of First Trimester Exposure                                                                           | Outcome (Anomalies) Definition                                                  | Drawn Conclusion                                                                              |
|-----------------------------|----------------------------------------------|----------|----------------------------------------------------------------------------------------------|--------------------------------------------------------------|------------------------------------------------------------------------------------------------------------------|---------------------------------------------------------------------------------|-----------------------------------------------------------------------------------------------|
| Wichman et al., 2009 [29]   | Retrospective cohort study (health registry) | USA      | 808 exposed, 24,406 not exposed                                                              | SSRIs, venlafaxine                                           | 0–13 weeks of gestation                                                                                          | CHA (diagnosed at birth or before discharge), obstetric data and medical record | No associations between SSRI use and CHA                                                      |
| Lennestal et al., 2007 [30] | Cohort study (national birth registries)     | Sweden   | 860,215 deliveries (732 women used SNRI/NRI in early pregnancy)                              | SNRIs/NRIs (mianserin, mirtazapine, venlafaxine, reboxetine) | First trimester (interview during the first antenatal care visit)                                                | Delivery outcome, including congenital anomalies                                | No increase in the risk of congenital anomalies in infants exposed to SNRI/NRIs               |
| Davis et al., 2007 [31]     | Retrospective cohort study (health registry) | USA      | 1047 exposed to SSRI at any time during pregnancy, 75,833 not exposed to any antidepressants | SSRI, TCAs                                                   | First 90 days of pregnancy (assumption of gestational age of 270 days before delivery date)                      | Congenital malformations & perinatal complications                              | No increase in the risk of cardiovascular anomalies with paroxetine use                       |
| Alwan et al., 2007 [32]     | Case-control study (NBDPS)                   | USA      | 9622 cases of congenital anomalies, 4092 controls. 408 exposed to SSRIs from both group      | Any SSRIs                                                    | 1 month before to 3 months after conception (date of conception: 266 days before the estimated date of delivery) | Major CHA, isolated and multiple anomalies                                      | Maternal use of SSRIs was not associated with an increased risk of CHA or other birth defects |

SRI: serotonin reuptake inhibitor; SSRI: selective serotonin reuptake inhibitor; CHA: congenital heart anomalies; LMP: last menstrual period; VSD: ventricular septal defect; TCA: tricyclic antidepressants; TOP: termination of pregnancy; SNRI: serotonin/noradrenaline reuptake inhibitor; NRI: noradrenaline reuptake inhibitor.
